# Supplementary material for: Phosphoproteomics identifies dual-site phosphorylation in an extended basophilic motif regulating FILIP1-mediated degradation of filamin-C
Source: PubMed Central journal article supplement (PMC7244511; doi:10.1038/s42003-020-0982-5), 2020-05-22
Supplement: 42003_2020_982_MOESM15_ESM.pdf [file 42003_2020_982_MOESM15_ESM.pdf]

## **SUPPLEMENTARY DATA LEGENDS**

**Supplementary Data 1. Proteome dataset.** Excerpts from the MaxQuant output files "proteinGroups" (spreadsheet proteins) and "peptides.txt" (spreadsheet peptides) derived from the quantitative proteome analysis of contracting C2 myotubes; contains information about the identification of proteins/protein groups and peptides. Contaminants and reversed entries were removed from the lists.

**Supplementary Data 2. Global IGF-1/LY phosphoproteome dataset.** Excerpts from the MaxQuant output file "PhosphoSTY" derived from the quantitative phosphoproteome analysis of contracting C2 myotubes treated for 60 min with IGF-1 or LY294002; contains information about phosphosite identification and localization as well as  $\log_2$ -transformed mean SILAC ratios (treatment/control) after p-value correction. Phosphopeptides with a minimum fold change of 1.5 and an adjusted p-value < 0.05 (n=3; two-tailed moderated student's t-test) are marked as significant. Contaminants and reversed entries were removed from the lists.

**Supplementary Data 3. List of unique phosphopeptides used for the motif analysis shown in Fig. 2c and 2d and Fig. S3c and S3d and motif-X results.**

**Supplementary Data 4. Results of GO enrichment analyses for phosphoproteins comprising the overrepresented sequence motifs.**

**Supplementary Data 5. Text mining results.**

**Supplementary Data 6. Global LY/MK phosphoproteome dataset.** Excerpts from the MaxQuant output file "PhosphoSTY" derived from the quantitative phosphoproteome analysis of contracting C2 myotubes treated for 30 min with IGF-1, LY294002 + IGF-1 and MK-2206 + IGF1; contains information about phosphosite identification and localization as well as log<sub>2</sub>-transformed mean SILAC ratios (treatment/control) after p-value correction. Phosphopeptides with a minimum fold change of 1.5 and an adjusted p-value < 0.01 (n=6; two-tailed moderated student's t-test) are marked as significant. Contaminants and reversed entries were removed from the lists. Table also contains data from Kinase-substrate enrichment analysis).

**Supplementary Data 7. Results from hierarchical cluster analysis and Reactome analysis with significantly regulated phosphopeptides from IGF-1/LY and LY/MK phosphoproteomes.** Results from (i) first clustering refer to Supplementary Fig. 3e, (ii) second clustering to Fig. 3c and 3e, and (iii) Reactome analysis to Fig. 3d.

**Supplementary Data 8. Quantitative MS data from *in vitro* kinase assays using Akt, PKC $\alpha$  and hFLNc d18-21.** Label-free quantification was performed using the Skyline software. Phosphopeptides from each of the three independent experiments were analyzed by LC-MS using multi-stage activation (MSA), electron-transfer dissociation (ETD) and higher-energy collisional dissociation (HCD).

**Supplementary Data 9. Quantitative MS data from cell-based kinase assays exported from Skyline.** Label-free quantification was performed using the Skyline software. Phosphopeptides from each of the four independent experiments were analyzed by targeted LC-MS using parallel reaction monitoring and higher-energy collisional dissociation (HCD).

**Supplementary Data 10. SILAC-MS data from *in vivo* proximity labelling experiments using BirA\*<sup>h</sup>FLNc d18-21 in C2 myotubes.** Excerpts from the MaxQuant output files "proteinGroups", including information about identified proteins/protein groups as well as the assigned cluster from k-means cluster analysis. Contaminants and reversed entries were removed from the lists.

**Supplementary Data 11. Result files from GO enrichment analysis of the BiOID dataset after cluster analysis.** Enrichment analysis was performed with the Cytoscape 3.3.0 app ClueGO. Enrichment was analyzed for the GO domain cellular component (CC). Bonferroni-step-down false discovery rate correction at a significance level of 0.05 was used for p-value correction of each cluster after the hypergeometric statistic test against all identified proteins within the analysis.

**Supplementary Data 12. Excerpts from the MaxQuant 'ProteinGroups' output file for the MS analysis of FLNc d1-3 and d18-21 pull-down experiments.** This file contains two spreadsheets with the first one (column header) giving explanations on the column headers used in the spreadsheet "MaxQuant results FLNc pull-down".

**Supplementary Data 13. Excerpts from the Mascot output file following MS analysis of FILIP1 pull-down experiment.** This file contains two spreadsheets with the first one (column header) giving explanations on the column header used in the spreadsheet "Mascot results FILIP pulldown".
