# Supplementary material for: Phosphoproteomics identifies dual-site phosphorylation in an extended basophilic motif regulating FILIP1-mediated degradation of filamin-C
Source: PubMed Central journal article supplement (PMC7244511; doi:10.1038/s42003-020-0982-5), 2020-05-22
Supplement: 42003_2020_982_MOESM16_ESM.pdf [file 42003_2020_982_MOESM16_ESM.pdf]

The full content of this file cannot be displayed with your current PDF viewer. Please update to the latest possible version to view this document.
