# Supplementary material for: Phosphoproteomics identifies dual-site phosphorylation in an extended basophilic motif regulating FILIP1-mediated degradation of filamin-C
Source: PubMed Central journal article supplement (PMC7244511; doi:10.1038/s42003-020-0982-5), 2020-05-22
Supplement: 42003_2020_982_MOESM17_ESM.pdf [file 42003_2020_982_MOESM17_ESM.pdf]

**Editorial Note:** *This manuscript has been previously reviewed at another Nature Research journal. The manuscript was considered suitable for publication without further review at Communications Biology*
